# Supplementary material for: Gene expression signatures of human senescent corneal and conjunctival epithelial cells
Source: publisher site journal article supplement (doi:10.18632/aging.205113), 2023-09-28
Supplement: Supplementary file [file aging-v15i18-205113-supplementary-material-SD1.pdf]

SUPPLEMENTARY FIGURE

**A SCo/nSCo**

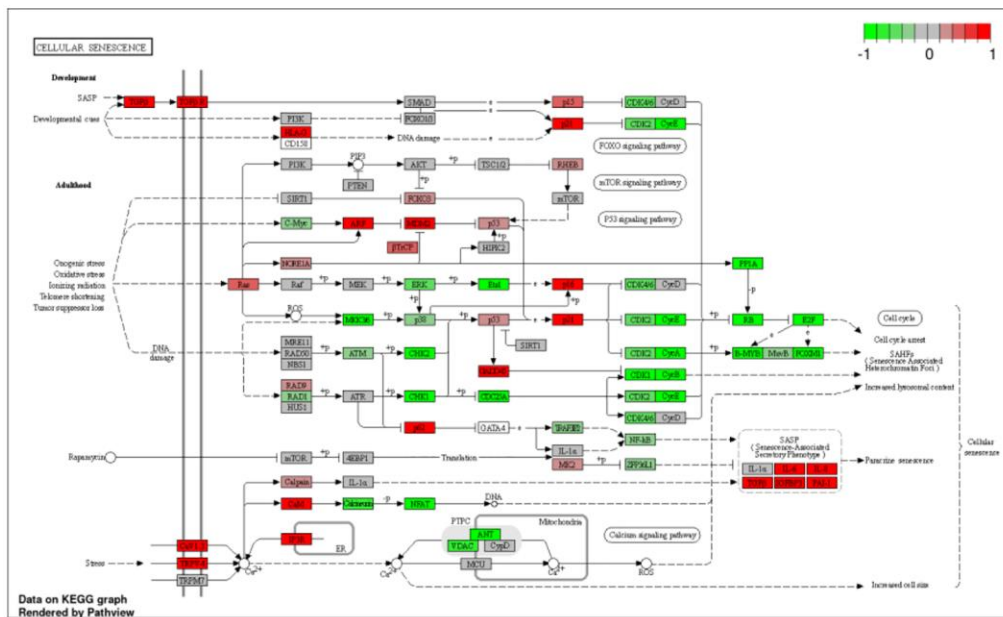

**B SCj/nSCj**

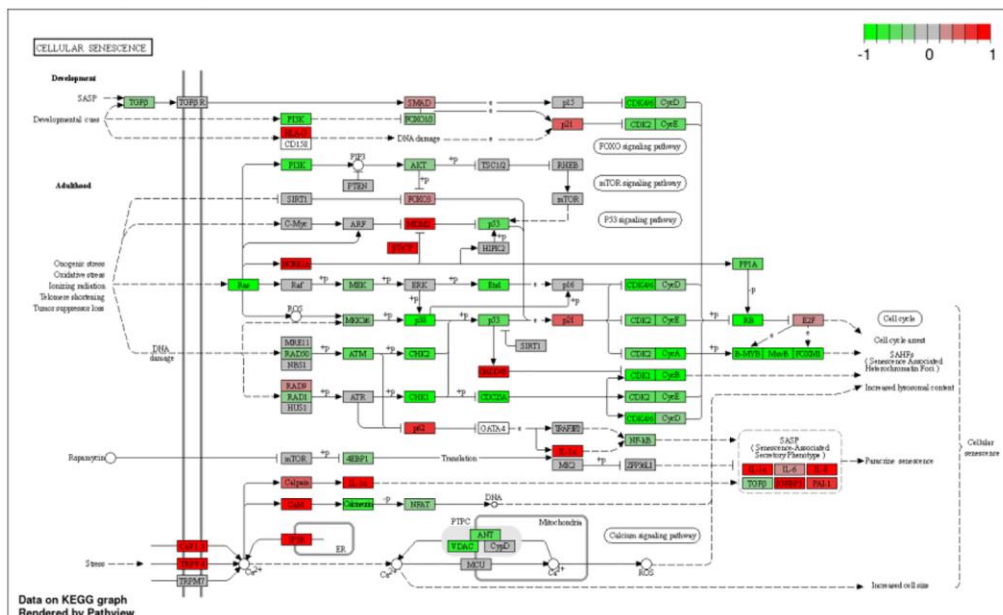

**Supplementary Figure 1. KEGG pathway of genes associated with cellular senescence in corneal and conjunctival cells. (A)** Kyoto Encyclopedia of Genes and Genomes (KEGG) pathways showing changes in expression of genes involved in senescence of corneal epithelial cells. **(B)** KEGG pathways showing changes in expression of genes involved in senescence of conjunctival epithelial cells. Abbreviations: SCo: senescent corneal epithelial cells; nSCo: non-senescent corneal epithelial cells; SCj: senescent conjunctival epithelial cells; nSCj: non-senescent conjunctival epithelial cells.
